# Supplementary material for: Retracted papers originating from paper mills: cross sectional study
Source: PubMed Central journal article supplement — BMJ. 2022 Nov 28;379:e071517. doi: 10.1136/bmj-2022-071517 (PMC9703783; doi:10.1136/bmj-2022-071517), 2022-11-28
Supplement: canc071517.ww.pdf [file canc071517.ww.pdf]

## Supplementary material

**Supplementary Table 1. Journals in which paper retracted for originating from paper mills, according to their Journal Citation Reports quarter and whether they are Open Access or not.**

| Journal                                                                         | Journal Quartile | Open Access | Number of retracted paper mill papers published in the journal | % of retracted paper mill papers published in the journal with respect with all retracted paper mill papers |
|---------------------------------------------------------------------------------|------------------|-------------|----------------------------------------------------------------|-------------------------------------------------------------------------------------------------------------|
| European Review for Medical and Pharmacological Sciences                        | 2                | Si          | 166                                                            | 14.04                                                                                                       |
| Journal of Cellular Biochemistry                                                | 2                | No          | 134                                                            | 11.34                                                                                                       |
| International Journal of Electrical Electrical Engineering & Education          | 1                | No          | 122                                                            | 10.32                                                                                                       |
| RSC Advances                                                                    | 2                | Si          | 68                                                             | 5.75                                                                                                        |
| Biomedicine & Pharmacotherapy                                                   | 1                | Si          | 50                                                             | 4.23                                                                                                        |
| Cellular Physiology and Biochemistry                                            | 1                | Si          | 49                                                             | 4.15                                                                                                        |
| Molecular Medicine Reports                                                      | 3                | Si          | 42                                                             | 3.55                                                                                                        |
| Artificial Cells, Nanomedicine, and Biotechnology                               | 1                | Si          | 40                                                             | 3.38                                                                                                        |
| Oncology Reports                                                                | 3                | Si          | 40                                                             | 3.38                                                                                                        |
| Journal of Cellular Physiology                                                  | 1                | No          | 37                                                             | 3.13                                                                                                        |
| Experimental and Therapeutic Medicine                                           | 3                | Si          | 34                                                             | 2.88                                                                                                        |
| OncoTargets and Therapy                                                         | 2                | Si          | 30                                                             | 2.54                                                                                                        |
| Bioscience Reports                                                              | 3                | Si          | 24                                                             | 2.03                                                                                                        |
| Cancer Management and Research                                                  | 3                | Si          | 22                                                             | 1.86                                                                                                        |
| The Anatomical Record: Advances in Integrative Anatomy and Evolutionary Biology | 3                | No          | 21                                                             | 1.78                                                                                                        |
| Oncology Letters                                                                | 4                | Si          | 19                                                             | 1.61                                                                                                        |
| Cancer Biotherapy & Radiopharmaceutics                                          | 3                | No          | 18                                                             | 1.52                                                                                                        |
| International Journal of Immunopathology and Pharmacology                       | 2                | Si          | 16                                                             | 1.35                                                                                                        |
| PLoS One                                                                        | 2                | Si          | 16                                                             | 1.35                                                                                                        |
| Cell Cycle                                                                      | 2                | No          | 15                                                             | 1.27                                                                                                        |
| Molecular Therapy - Nucleic Acids                                               | 1                | Si          | 13                                                             | 1.10                                                                                                        |
| Experimental and Molecular Pathology                                            | 2                | No          | 13                                                             | 1.10                                                                                                        |

|                                                                          |       |    |    |      |
|--------------------------------------------------------------------------|-------|----|----|------|
| Oncology Research Featuring Preclinical and Clinical Cancer Therapeutics | No IF | Si | 12 | 1.02 |
| Technology in Cancer Research & Treatment                                | 3     | Si | 12 | 1.02 |
| JBUON: Journal of Balkan Union of Oncology                               | No IF | Si | 10 | 0.85 |
| American Journal of Cancer Research                                      | 1     | Si | 9  | 0.76 |
| International Journal of Oncology                                        | 2     | Si | 9  | 0.76 |
| Life Sciences                                                            | 1     | No | 9  | 0.76 |
| Brazilian Journal of Medical and Biological Research                     | 2     | Si | 8  | 0.68 |
| Frontiers in Oncology                                                    | 2     | Si | 8  | 0.68 |
| International Journal of Molecular Medicine                              | 2     | Si | 8  | 0.68 |
| Naunyn-Schmiedeberg's Archives of Pharmacology                           | 3     | Si | 8  | 0.68 |
| Pharmacological Reports                                                  | 3     | Si | 6  | 0.51 |
| Tumor Biology                                                            | No IF | Si | 6  | 0.51 |
| Cancer Biomarkers                                                        | 2     | No | 5  | 0.42 |
| International Immunopharmacology                                         | 2     | No | 5  | 0.42 |
| BioMed Research International                                            | 2     | Si | 3  | 0.25 |
| FEBS letters                                                             | 3     | Si | 3  | 0.25 |
| Journal of Experimental & Clinical Cancer Research                       | 1     | Si | 3  | 0.25 |
| Journal of International Medical Research                                | 4     | Si | 3  | 0.25 |
| Cancer Gene Therapy                                                      | 1     | No | 2  | 0.17 |
| Chemico-Biological Interactions                                          | 1     | No | 2  | 0.17 |
| DNA and Cell Biology                                                     | 3     | No | 2  | 0.17 |
| BMC Cancer                                                               | 2     | Si | 2  | 0.17 |
| CNS Neuroscience & Therapeutics                                          | 1     | Si | 2  | 0.17 |
| Journal of Cellular and Molecular Medicine                               | 2     | Si | 2  | 0.17 |
| Molecular Immunology                                                     | 2     | No | 2  | 0.17 |
| Archives of Biochemistry and Biophysics                                  | 2     | No | 1  | 0.08 |
| Biochemical and Biophysical Research Communications                      | 2     | No | 1  | 0.08 |
| Biochemistry and Cell Biology: Biochimie Et Biologie Cellulaire          | 3     | No | 1  | 0.08 |
| Biochimica et Biophysica Acta (BBA) - General Subjects                   | 3     | No | 1  | 0.08 |
| Biofactors                                                               | 1     | No | 1  | 0.08 |

|                                                              |       |    |   |      |
|--------------------------------------------------------------|-------|----|---|------|
| Cell Biochemistry and Biophysics                             | 3     | No | 1 | 0.08 |
| Cell Biochemistry and Function                               | 3     | No | 1 | 0.08 |
| Cell Stress and Chaperones                                   | 3     | No | 1 | 0.08 |
| Cellular and Molecular Neurobiology                          | 2     | No | 1 | 0.08 |
| Cluster Computing                                            | 2     | No | 1 | 0.08 |
| Cytogenetic and Genome Research                              | 4     | No | 1 | 0.08 |
| European Journal of Pharmacology                             | 2     | No | 1 | 0.08 |
| Experimental Cell Research                                   | 3     | No | 1 | 0.08 |
| Food & Function                                              | 1     | No | 1 | 0.08 |
| Gene                                                         | 2     | No | 1 | 0.08 |
| Gene Therapy                                                 | 1     | No | 1 | 0.08 |
| Human Gene Therapy                                           | 1     | No | 1 | 0.08 |
| International Journal of Clinical and Experimental Pathology | No IF | Si | 1 | 0.08 |
| Journal of Cardiovascular Pharmacology                       | 3     | No | 1 | 0.08 |
| ACS Omega                                                    | 2     | Si | 1 | 0.08 |
| American Journal of Physiology - Cell Physiology             | 2     | Si | 1 | 0.08 |
| American Journal of Translational Research                   | 2     | Si | 1 | 0.08 |
| BMC Complementary Medicine and Therapies                     | No IF | Si | 1 | 0.08 |
| BMC Medical Genetics                                         | 3     | Si | 1 | 0.08 |
| BMC Molecular and Cell Biology                               | 4     | Si | 1 | 0.08 |
| Cancer Medicine                                              | 2     | Si | 1 | 0.08 |
| Microbial Pathogenesis                                       | 2     | No | 1 | 0.08 |
| Cancer Science                                               | 1     | Si | 1 | 0.08 |
| Cell Death & Disease                                         | 1     | Si | 1 | 0.08 |
| FEBS open bio                                                | 3     | Si | 1 | 0.08 |
| Frontiers in Endocrinology                                   | 1     | Si | 1 | 0.08 |
| Frontiers in Pharmacology                                    | 1     | Si | 1 | 0.08 |
| Frontiers in Physiology                                      | 1     | Si | 1 | 0.08 |
| Neuroscience Letters                                         | 3     | No | 1 | 0.08 |
| Human Cell                                                   | 3     | Si | 1 | 0.08 |
| Journal of Clinical Laboratory Analysis                      | 3     | Si | 1 | 0.08 |
| Journal of Diabetes Research                                 | 2     | Si | 1 | 0.08 |
| Journal of Materials Science: Materials in Electronics       | 2     | Si | 1 | 0.08 |
| Journal of Molecular Neuroscience                            | 3     | Si | 1 | 0.08 |

|                                                 |   |    |   |      |
|-------------------------------------------------|---|----|---|------|
| Kidney and Blood Pressure Research              | 3 | Si | 1 | 0.08 |
| Molecular Medicine                              | 1 | Si | 1 | 0.08 |
| Neurobiology of Disease                         | 1 | Si | 1 | 0.08 |
| Neuropsychiatric Disease and Treatment          | 3 | Si | 1 | 0.08 |
| Open Biology                                    | 1 | Si | 1 | 0.08 |
| Pathology & Oncology Research                   | 2 | Si | 1 | 0.08 |
| RSC Medicinal Chemistry                         | 4 | No | 1 | 0.08 |
| Pharmacology                                    | 3 | Si | 1 | 0.08 |
| Sustainable Energy Technologies and Assessments | 2 | No | 1 | 0.08 |
| RNA Biology                                     | 2 | Si | 1 | 0.08 |
| The International Journal of Biochemistry       | 2 | No | 1 | 0.08 |
| Thinking Skills and Creativity                  | 2 | No | 1 | 0.08 |
| Risk Management and Healthcare Policy           | 2 | Si | 1 | 0.08 |

IF: Impact Factor.

Note: Hybrid and transformative journals were categorized as non-Open Access. Journals belonging to Spandidos Publications were categorized as Open Access journals since they do not offer a subscription modality.

**Supplementary Table 2. Publishing houses of the journals in which papers retracted for originating from paper mills were published**

| <b>Publishing house</b>                        | <b>Number of papers retracted for originating from paper mills</b> | <b>% of papers retracted for originating from paper mills</b> |
|------------------------------------------------|--------------------------------------------------------------------|---------------------------------------------------------------|
| Wiley                                          | 205                                                                | 17.34                                                         |
| Verduci Editore                                | 166                                                                | 14.04                                                         |
| SAGE Publications                              | 153                                                                | 12.94                                                         |
| Spandidos                                      | 152                                                                | 12.86                                                         |
| Elsevier                                       | 93                                                                 | 7.87                                                          |
| Royal Society of Chemistry (RSC)               | 70                                                                 | 5.92                                                          |
| Taylor and Francis                             | 56                                                                 | 4.74                                                          |
| Taylor and Francis - Dove Press                | 54                                                                 | 4.57                                                          |
| Cellular Physiol Biochem Press                 | 49                                                                 | 4.15                                                          |
| Portland Press                                 | 24                                                                 | 2.03                                                          |
| Mary Ann Liebert                               | 21                                                                 | 1.78                                                          |
| Springer                                       | 21                                                                 | 1.78                                                          |
| PLoS                                           | 16                                                                 | 1.35                                                          |
| Cell Press                                     | 13                                                                 | 1.10                                                          |
| Cognizant Communication Corporation            | 12                                                                 | 1.02                                                          |
| Frontiers                                      | 12                                                                 | 1.02                                                          |
| IOS Press                                      | 11                                                                 | 0.93                                                          |
| e-Century Publishing Corporation               | 11                                                                 | 0.93                                                          |
| BAKIS Productions LTD                          | 10                                                                 | 0.85                                                          |
| Associação Brasileira de Divulgação Científica | 8                                                                  | 0.68                                                          |
| Springer - Biomed Central (BMC)                | 8                                                                  | 0.68                                                          |
| Hindawi                                        | 4                                                                  | 0.34                                                          |
| Springer - Nature Publishing Group             | 4                                                                  | 0.34                                                          |
| Karger                                         | 3                                                                  | 0.25                                                          |
| American Chemical Society (ACS)                | 1                                                                  | 0.08                                                          |
| American Physiological Society                 | 1                                                                  | 0.08                                                          |
| Canadian Science Publishing                    | 1                                                                  | 0.08                                                          |
| MDPI                                           | 1                                                                  | 0.08                                                          |
| Royal Society Publishing                       | 1                                                                  | 0.08                                                          |
| Wolters Kluwer - Lippincott Williams & Wilkins | 1                                                                  | 0.08                                                          |
